# Supplementary material
Source: PubMed Central journal article supplement (PMC6638521)
Supplement: MPP-17-1382-s001.pdf [file MPP-17-1382-s001.pdf]

**Endoplasmic Reticulum Stress Responses Function in the HRT-mediated  
Hypersensitive Response in *Nicotiana benthamiana***

Ju Yeon Moon<sup>1,2</sup>, Jeong Hee Lee<sup>1</sup>, Chang-Sik Oh<sup>3</sup>, Hong-Gu Kang<sup>4</sup>, and Jeong Mee Park<sup>1,2,\*</sup>

Supporting Information

**Table S1** Putative *CaBLP5* homologs identified in *Nicotiana benthamiana*

| <i>N. benthamiana</i> homolog*                       | bp   | Annotation                                                | E-value | Identity |
|------------------------------------------------------|------|-----------------------------------------------------------|---------|----------|
| <b><i>BiP5</i></b><br><b>(<i>Nbv3K685813373</i>)</b> | 2148 | Luminal-binding protein 5 (BiP5), Precursor               | 0.0     | 93%      |
| <b><i>BiP4</i></b><br><b>(<i>Nbv3K645786225</i>)</b> | 2004 | Nicotiana benthamiana ER luminal-binding protein (BLP4)   | 0.0     | 89%      |
| <b><i>Nbv3K645786225</i></b>                         | 2126 | Luminal-binding protein 4 (BiP4), Precursor               | 0.0     | 82%      |
| <b><i>Nbv3K645789686</i></b>                         | 2203 | Luminal-binding protein 5 (BiP 5), Precursor (similar to) | 0.0     | 81%      |
| <b><i>Nbv3K585690033</i></b>                         | 1028 | Luminal-binding protein 2 (AtBiP2), Precursor             | 2E-9    | 83%      |
| <b><i>Nbv3K585703505</i></b>                         | 1945 | Heat shock cognate 70 kDa protein (similar to)            | 2E-13   | 81%      |
| <b><i>Nbv3K765636570</i></b>                         | 998  | Heat shock cognate 70 kDa protein 2 (similar..to)         | 2E-10   | 82%      |

\**CaBLP5* homologs were isolated using BLAST searches in the *N. benthamiana*\_transcriptome\_v3\_unigenes95 database (<http://benth-web-pro-1.ucc.usyd.edu.au/blast/search.php>), and retrieved six *CaBLP5* homologs, which have less than  $10^{-9}$  e-value and more than 80% identity with positive orientation.

**Table S2** List of oligonucleotide primers used.

| Primers                        | Sequence                           | Utilization |
|--------------------------------|------------------------------------|-------------|
| <i>Actin-F</i>                 | 5'-TGGACTCTGGTGATGGTGTC-3'         | RT-PCR      |
| <i>Actin-R</i>                 | 5'-CCTCCAATCCAAACTGTGA-3'          | RT-PCR      |
| <i>RAR1-F</i>                  | 5'-ATGGAGAGACTTCGTTGCCA-3'         | RT-PCR      |
| <i>RAR1-R</i>                  | 5'-TCTAGGACAAGCTTCTTTTCG-3'        | RT-PCR      |
| <i>Actin-F</i>                 | 5'-AGAGGCTACTCTTTTACCACCACGG-3'    | qRT-PCR     |
| <i>Actin-R</i>                 | 5'-TGAGCTGGTCTTTGCTGTTTCAAGT-3'    | qRT-PCR     |
| <i>HRT-F</i>                   | 5'-TGATGGATTTCGCATGGGTCT-3'        | qRT-PCR     |
| <i>HRT-R</i>                   | 5'-AGCAGCATCTTCCAACCTCT-3'         | qRT-PCR     |
| <i>TCV CP-F</i>                | 5'-AGCCAAACCTCCGCCCAAC-3'          | qRT-PCR     |
| <i>TCV CP-R</i>                | 5'-CTGATACCATCCGCCACAAAGC-3'       | qRT-PCR     |
| <i>HSP90-F</i>                 | 5'-TTGAGACTGCCCTCCTCACC-3'         | qRT-PCR     |
| <i>HSP90-R</i>                 | 5'-TCGTCTGTTCGGGAGCTTG-3'          | qRT-PCR     |
| <i>SGT1-F</i>                  | 5'-GCCAGAGGAGGTGGTGGTGA-3'         | qRT-PCR     |
| <i>SGT1-R</i>                  | 5'-AAGTTTCGTCACCCGGCACA-3'         | qRT-PCR     |
| <i>Hin1-F</i>                  | 5'-GCCATGCCGGAATCCAATTT-3'         | qRT-PCR     |
| <i>Hin1-R</i>                  | 5'-TTGCAGAGGCAGCCAAAGAGA-3'        | qRT-PCR     |
| <i>Hsr203J-F</i>               | 5'-GCTCCGGCGGGAACATAGTC-3'         | qRT-PCR     |
| <i>Hsr203J-R</i>               | 5'-TCCGATAGGACCGCACGAAA-3'         | qRT-PCR     |
| <i>NTCP23-F</i>                | 5'-AGAGACAGGTTGGGGGCAGC-3'         | qRT-PCR     |
| <i>NTCP23-R</i>                | 5'-CAAGATCCGCACTTGCCCTG-3'         | qRT-PCR     |
| <i>PR1a-F</i>                  | 5'-GGGACGACCAGGTAGCAGCC-3'         | qRT-PCR     |
| <i>PR1a-R</i>                  | 5'-CATTGACCCACATCTCAACGGC-3'       | qRT-PCR     |
| <i>PR2-F</i>                   | 5'-TGTTGCTCCTGCCATGCAAA-3'         | qRT-PCR     |
| <i>PR2-R</i>                   | 5'-GGGCGGGTTGGTATTCGCTA-3'         | qRT-PCR     |
| <i>PR5-F</i>                   | 5'-GGCATGGCTAAGTCAATCCACC-3'       | qRT-PCR     |
| <i>PR5-R</i>                   | 5'-GTCTCCGTCGCCACCAGATG-3'         | qRT-PCR     |
| <i>CYP71D20-F</i>              | 5'-AAGGTCCACCGCACCATGTCCTTAGAG-3'  | qRT-PCR     |
| <i>CYP71D20-R</i>              | 5'-AAGAATTCCTTGCCCCTTGAGTACTTGC-3' | qRT-PCR     |
| <i>WRKY8-F</i>                 | 5'-AACAAATGGTGCCAATAATGC-3'        | qRT-PCR     |
| <i>WRKY8-R</i>                 | 5'-TGCATATCCTGAGAAACCATT-3'        | qRT-PCR     |
| <i>bZip60-F</i>                | 5'-CCTGCTTTGGTTCATGGGCATCAT-3'     | qRT-PCR     |
| <i>bZip60-R</i>                | 5'-CACATCACAATTCCTCAATAATG-3'      | qRT-PCR     |
| <i>Calreticulin-F</i>          | 5'-TGCTCGTCGCTGTCTCTCC-3'          | qRT-PCR     |
| <i>Calreticulin-R</i>          | 5'-GCGTCTCCATTCCACTTGCC-3'         | qRT-PCR     |
| <i>Beclin1-F</i>               | 5'-CGTCGTTTTGCCTCCACCAG-3'         | qRT-PCR     |
| <i>Beclin1-R</i>               | 5'-GGAGCATTTTGAGGCCACC-3'          | qRT-PCR     |
| <i>p58<sup>IPK</sup>-F</i>     | 5'-CTTGCTGTGGAGGAGTACAAAG-3'       | qRT-PCR     |
| <i>p58<sup>IPK</sup>-R</i>     | 5'-CTCCCTCCCAATCTTCTGTTAG-3'       | qRT-PCR     |
| <i>PR4-F</i>                   | 5'-GGTGTGGGTCTACACCAGAATA-3'       | qRT-PCR     |
| <i>PR4-R</i>                   | 5'-CAATTCTCACTGTGGTCTGAGC-3'       | qRT-PCR     |
| <i>Nbv3K685813373-F (BiP5)</i> | 5'-GTTCCAGAGGCAGTGTCTGT-3'         | qRT-PCR     |
| <i>Nbv3K685813373-R (BiP5)</i> | 5'-TCTCAGGATTAACAGCAGCC-3'         | qRT-PCR     |
| <i>Nbv3K645786225-F (BiP4)</i> | 5'-TTTCTCCTCCTTCTACCCCTCT-3'       | qRT-PCR     |
| <i>Nbv3K645786225-R (BiP4)</i> | 5'-AACGATTGCTAGCACCACCA-3'         | qRT-PCR     |
| <i>Nbv3K585690033-F</i>        | 5'-CTTACCCTTCTCTCTTCT-3'           | qRT-PCR     |
| <i>Nbv3K585690033-R</i>        | 5'-CTCGACGTTATTCTCTCT-3'           | qRT-PCR     |
| <i>YFP-F</i>                   | 5'-GAAGCAGCACGACTTCTTCA-3'         | qRT-PCR     |
| <i>YFP-R</i>                   | 5'-CGGCCATGATATAGACGTTG-3'         | qRT-PCR     |

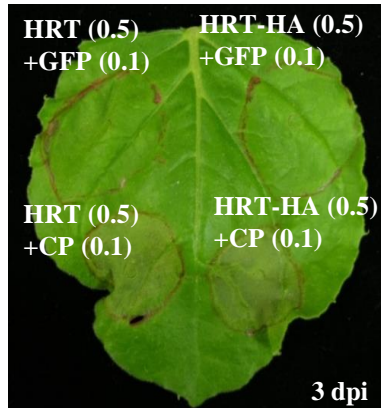

**Fig. S1 HA-tagged HRT is functional.** Co-expression of *HRT-HA* and *Turnip crinkle virus* (TCV) coat protein (CP) induced the hypersensitive response (HR) in *N. benthamiana*. Numbers indicate concentration ( $OD_{600}$ ) of *Agrobacterium* cells. The images were photographed 3 days post-infiltration (dpi).

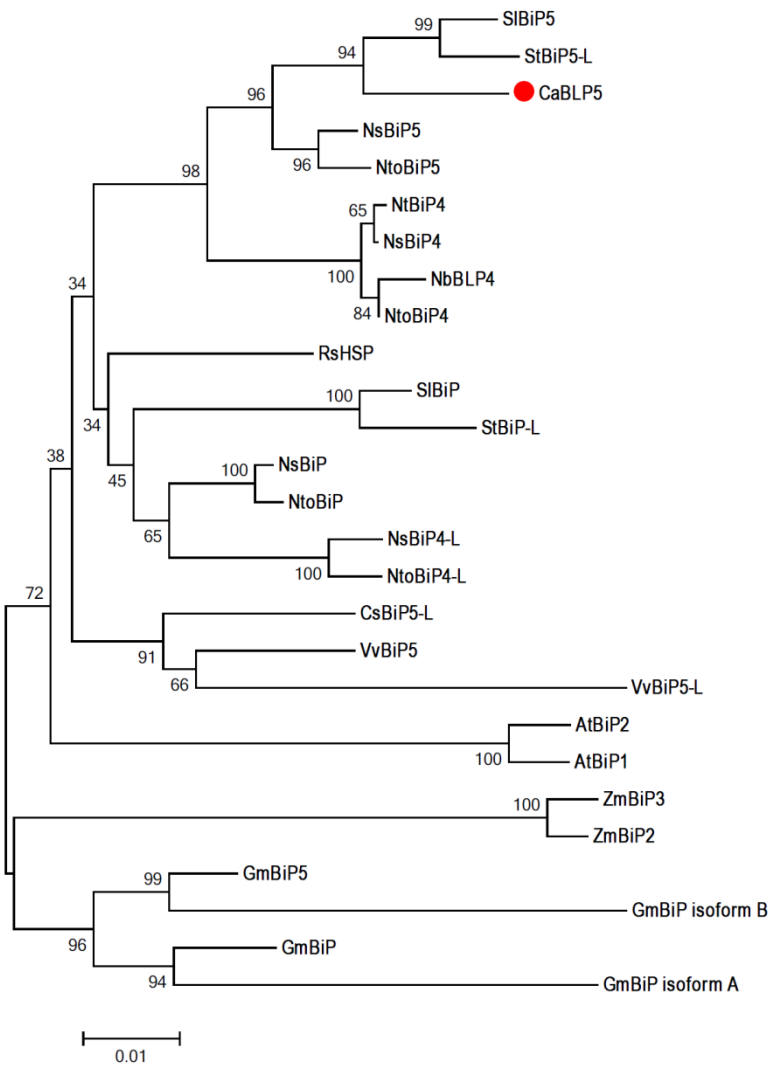

**Fig. S2 Phylogenetic analysis of CaBLP5 (GenBank accession No. KC912859) and its homologs.** The amino-acid sequences of 26 CaBLP5 homologs were imported into MEGA 6 (Tamura *et al.*, 2013) for multiple sequence alignment with ClustalW (Larkin *et al.*, 2007). Phylogenetic analysis was performed using the neighbor-joining (Saitou and Nei., 1987) and bootstrap methods. The bootstrap consensus tree was inferred from 500 replicates. The scale bar indicates the lengths of the branches (relative evolutionary distance). The protein sequences are deposited in GenBank under the following accession numbers: *Solanum lycopersicum* SIBiP5 (XP\_004234985.1) and SIBiP (NP\_001234636.1), *Solanum tuberosum* StBiP5-L (XP\_006350519.1) and StBiP-L (XP\_006343810.1), *Nicotiana benthamiana* NbBLP4 (ACK55195.1), *Zea mays* ZmBiP3 (NP\_001105894.1) and ZmBiP2 (NP\_001105893.1), *Arabidopsis thaliana* AtBiP2 (NP\_851119.1) and AtBiP1 (NP\_198206.1), *Nicotiana tabacum* NtBiP4 (Q03684.1), *Cucumis sativus* CsBiP5-L (XP\_004143862.1), *Vitis vinifera* VvBiP5 (XP\_002263323.1) and VvBiP5-L (XP\_002276268.2), *Nicotiana sylvestris* NsBiP5 (XP\_009773333.1), NsBiP4 (XP\_009788736.1), NsBiP (XP\_009802727.1), and NsBiP4-L (XP\_009770477.1), *Nicotiana tomentosiformis* NtoBiP5 (XP\_009592769.1), NtoBiP4 (XP\_009588550.1), NtoBiP (XP\_009593820.1), and NtoBiP4-L (XP\_009619852.1), *Ricinus communis* RsHSP (XP\_002518865.1), *Cucumis sativus* CsBiP5-L (XP\_004143862.1), and *Glycine max* GmBiP (XP\_003525327.2), GmBiP isoform A (NP\_001234941.1), and GmBiP isoform B (NP\_001238736.1).

Nbv3K585703505 -----  
Nbv3K765636570 -----  
Nbv3K645786225 AATCTTTCTCCTCCTTCTACCCCTCTGACTCACTATATTAATTCTCTTAAATTTTTTTCAC 60  
Nbv3K645789686 -----  
Nbv3K685813373 -----  
NbBLP4 -----  
CaBLP5 -----  
Nbv3K585690033 -----

Nbv3K585703505 -----  
Nbv3K765636570 -----CAGCTCTCACTATAAAAACCTTCTCTTTGCT----- 31  
Nbv3K645786225 AAAAATTGTACAAAAAGTGTGAAGAATTTGTTATCTGGGTCTTGAATAA----- 108  
Nbv3K645789686 -----  
Nbv3K685813373 -----CAGAGACTG-GCAACTATATATAGCCGGGCCTTCAATTGCCGAACCTGAAA 50  
CaBLP5 -----GGAGAAGAGAAAAAGGAAGAAGATATTGTTCG----- 32  
Nbv3K585690033 -----

Nbv3K585703505 -----  
Nbv3K765636570 -----  
Nbv3K645786225 -----  
Nbv3K645789686 -----  
Nbv3K685813373 ATCCATAACTGTCTGTTTCTTTGATCAGCGAGAGAAGAGAAAACGATTCAACGACGAAGAT 110  
CaBLP5 -----  
Nbv3K585690033 -----

Nbv3K585703505 -----  
Nbv3K765636570 -----CCATATTT 39  
Nbv3K645786225 -----TTAGAGTTGAAGCCATGGGTGGC 131  
Nbv3K645789686 -----  
Nbv3K685813373 ATTGTTCCAGAGGCAGTGTCTGTGGAAAAGGTGTCCTTGTGGATCTACGAGTTATGGCT 170  
CaBLP5 -----TTTTGGATCTGCGAGCTATGGCT 55  
Nbv3K585690033 -----A 1

Nbv3K585703505 -----  
Nbv3K765636570 TCTCTCTCAAAAACCTAGTTCTCCTAAAGTATTCTCTAAGCTCTCCTCTAAACTAGCCCG 99  
Nbv3K645786225 GGCTACTGGAGGCGGAGCAGTTCTCTGGTGGTGCTAGCAATCGTTTTATTCGGTTGTCTT 191  
Nbv3K645789686 -----  
Nbv3K685813373 GGTGCGTGGAAGAGACGCGCATCCTTGGTCGTTTTTCGCAATCGTCCTCTTCGGGAGCTTG 230  
CaBLP5 GCTGCGTGGAAGACACGCGCTTCTTACTGTTTTTCGCAATCGTCCTCTTCGGGAGTTG 115  
Nbv3K585690033 CGACCCTCAACTATATATAGCCTCTTACCCTTCTCTTCTCTCATTATTCATAACAT- 60

Nbv3K585703505 -----AAAA--AATGGCCGGAA-AAGGTGA-----AGGGCC 28  
Nbv3K765636570 ACACTAAACAAAAGGATAGTAAAATCAATGGCCGGAA-AAGGAGA-----AGGTCC 149  
Nbv3K645786225 T-----CTGCACTTTCGATTGCCACAG-AGGAGGCAAACAAACTAGGAAC 235  
Nbv3K645789686 -----  
Nbv3K685813373 T-----TCGCATTTTCTATAGCTAAAAG-AAGAAGCTACAAAGTTAGGAAC 274  
CaBLP5 T-----TTGCATTTTTCGATAGCTAAAAG-AAGAAGCTACCAAGTTAGGAAC 159  
Nbv3K585690033 -----CAAAATCATTCAATTAAGAAGGAGG-----AGAATGGGTC 96

Nbv3K585703505 AGCAATTG--GTAT----TGA

\*\* \* \* \* \* \*

Nbv3K585703505 TGATCGTGGAGATCA---TAGCGAATGATCAAG---GGAACAGGACGACACCGTCTT 135

\* \* \* \* \* \* \* \* \* \* \* \* \* \* \* \*

Nbv3K585703505 ATGTTGCTTTTACTGATACTGAACGTTTGATTG-GTGAT-GC-TGCTAAGAA----- 184

\* \* \* \* \* \* \* \* \* \* \* \* \* \* \* \*

Nbv3K585703505 --TCAGG-TTGCTATGAACC-CCATTAACACTGTCTT-CGATGCTAAGTG----ATTGAT 235

\* \* \* \* \* \* \* \* \* \* \* \* \* \* \* \*

Nbv3K585703505 TGGGA---GGAGATTAAGCGATCCTTCTGTGCAGAGCGATATGAAATTATGGCCTTTTAA 292

\* \* \* \* \* \* \* \* \* \* \* \* \* \* \* \*

Nbv3K585703505 GGTAATAGCTGGGCCTGGTGACAAGCCAATGATTGTTGTAACCTACAAGGGTGAAGAG-- 350

\* \* \* \* \* \* \* \* \* \* \* \* \* \* \* \*

Nbv3K585703505 -AAGCAATTTTCGGCTGAGGAGATCTCTTCTATGGTACTACCAAGAT-AAGGAGATCGC 408  
Nbv3K765636570 -AAACAGTTTGCTGCCGAGGAGATCTCATCTATGGTGCTCATAAAGATGAAAGAGATTGC 530  
Nbv3K645786225 TAAGGTATTTAGTCCTGAGGAAATCAGTGGCATGATTCTGATAAAGATGAAGGAGACAGC 616  
Nbv3K645789686 TAAGGTATTTAGTCCTGAGGAAATCAGTGGCATGATTCTGATAAAGATGAAGGAGACAGC 347  
Nbv3K685813373 TAAGGTCTTCAGTCCTGAGGAGATCAGTGGCATGATTCTGACCAAGATGAAAGAAACAGC 655  
CaBLP5 CAAGGTCTTCAGTCCTGAGGAGATCAGTGGCATGATTCTGACCAAGATGAAAGAAACAGC 540  
Nbv3K585690033 GAAAAAGTTTAGCCAGAAGAAATAGTGGTATGATCTTGCAAAAAATGAAGGAAACAGC 511  
\*\* \*\* \* \*\* \* \* \* \* \* \* \* \* \* \* \* \* \* \*

Nbv3K585703505 TGAGGCTTACCTTGGAACTACAATTAAGAATGCAGTTGTCACAGTCCCTGCTTACTTCAA 468  
Nbv3K765636570 TGAAGCATTCCCTTGGCACAACGTTAAGAATGCTGTGGTTACTGTTCCAGCCTACTTCAA 590  
Nbv3K645786225 TGAAGCTTTCCTTGGAAAGAAAATTAAGGATGCTGTAGTAAGTGTTCCTGCTTATTTCAA 676  
Nbv3K645789686 TGAAGCTTTCCTTGGAAAGAAAATTAAGGATGCTGTAGTAAGTGTTCCTGCTTATTTCAA 407  
Nbv3K685813373 AGAAGCTTACCTTGGAAAGAAAATCAAGGATGCAGTTGTCACAGTCCCAGCATACTTCAA 715

CaBLP5 GGAAGCTTACCTTGGAAAGACAATCAAGGATGCAGTTGTCAGTGTTCAGCATACTTCAA 600  
Nbv3K585690033 TGAGGCTTATTTAGGGAAGTCGATTAACATGCTGTATTACCCTTCCAGCTTATTTTAA 571  
\*\* \* \* \* \* \* \* \* \* \* \* \* \* \* \* \* \* \* \* \* \*

Nbv3K585703505 TGACTCGCAGCGACAAGCAACTAAGGATGCTGGTGTCAATTTCTGGCCTTAATGTGATGCG 528  
Nbv3K765636570 TGACTCTCAGCGTCAGGCCACCAAGGATGCTGGTGTATTTCTGGCCTGAATGTGATGCG 650  
Nbv3K645786225 TGACGCGCAAAGGCAGGCTACTAAGGATGCAGGTGTATTGCTGGCTTAAATGTTGCAAG 736  
Nbv3K645789686 TGACGCGCAAAGGCAGGCTACTAAGGATGCAGGTGTATTGCTGGCTTAAATGTTGCAAG 467  
Nbv3K685813373 TGATGCCAGAGGCAGGCCACTAAGGATGCAGGTGTATTGCTGGTTTGAACGTGGCAAG 775  
CaBLP5 TGACGCCAGAGGCAGGCCACTAAGGATGCAGGTGTATTGCTGGTTTGAACGTGGCAAG 660  
Nbv3K585690033 TGATGCGCAAAGGCAAGCAACTAAGGATGCTGGCGCCATAGCAGGTTGAATGTAGTAAG 631  
\*\*\* \* \*\* \* \*\* \* \* \* \* \* \* \* \* \* \* \* \* \* \*

Nbv3K585703505 TATAATCAACGAACCTACAGCAGCTGCAATTGCTTATGGACTTGACAAGAAGGCTAGCAG 588  
Nbv3K765636570 TATTATCAATGAACCTACAGCAGCTGCCATTGCTTATGGTCTTGATAAGAAGGCAACAAG 710  
Nbv3K645786225 AATTATTAATGAACCAACAGCAGCAGCTATTGCTTATGGATTGGACAAGAAAGG----- 790  
Nbv3K645789686 AATTATTAATGAACCAACAGCAGCAGCTATTGCTTATGGATTGGACAAGAAAGG----- 521  
Nbv3K685813373 AATCATTAACGAACCAACTGCAGCTGCCATTGCCTATGGATTAGAT AAGAAAG----- 829  
CaBLP5 GATCATTAAACGAACCTACAGCAGCTGCCATTGCGTATGGATTAGATAAGAAAG----- 714  
Nbv3K585690033 GATAATAAACGAGCCTACC CGCGTGCAATAGCCTATGGATTGGACAAGAAAGGA----- 686  
\*\* \* \* \* \* \* \* \* \* \* \* \* \* \* \* \* \* \* \* \* \*

Nbv3K585703505 TGCTGGTGAAGAAGATGTGCTTATTTTGACCTAGGTGGCGTACTTTTGATGTTTCTCT 648  
Nbv3K765636570 TGTTGGTGAGAAGAATGTGCTTATCTTTGATCTTGGTGGTGGTACATTGATGTCTCTCT 770  
Nbv3K645786225 ---TGCCGAGAAGAACATTCTCGTCTTTGATCTTGGTGGTGGGACATTGATGTCAAGTGT 847  
Nbv3K645789686 ---TGCCGAGAAGAACATTCTCGTCTTTGATCTTGGTGGTGGGACATTGATGTCAAGTGT 578  
Nbv3K685813373 ---TGGTGAAGAAGAACATCCTGGTCTTTGACCTTGGTGGTGGTACATTGATGTTAGTAT 886  
CaBLP5 ---TGGTGAAGAAGAACATCCTTGTCTTTGACCTTGGTGGTGGTACTTTTGATGTCAAGTAT 771  
Nbv3K585690033 ---AAAGAGCAGAATATTTGGTGTATGATCTTGGCGGTGGCACATTGACGTGAGCGT 742  
\* \* \* \* \* \* \* \* \* \* \* \* \* \* \* \* \* \* \* \*

Nbv3K585703505 TCTTACAATAGAAGAGGGTATCTTTGAGGTTAAAGCTACTGCTGGTGATACTCATTTGGG 708  
Nbv3K765636570 TCTTACAATTGAGGAAGGTATCTTTGAGGTGAAAGCTACAGCTGGAGACACTCATCTTGG 830  
Nbv3K645786225 CTTGACAATTGACAATGGTGTGTTGAGGTTCTGTCCACAAATGGAGATACCCATCTTGG 907  
Nbv3K645789686 CTTGACAATTGACAATGGTGTGTTGAGGTTCTGTCCACAAATGGAGATACCCATCTTGG 638  
Nbv3K685813373 CCTCACTATTGACAACGGTGTTTTGGAGTTCTTGGCACAATGGAGACACTCATCTTGG 946  
CaBLP5 CCTTACTATTGACAATGGTGTTTTGGAGTTCTTGGCACAATGGAGACACTCATCTTGG 831  
Nbv3K585690033 ACTTAGCATTGACAATGGTGTTTTGGAGTATTAGCAACCAATGGTAACACTCACTTAGG 802  
\* \* \* \* \* \* \* \* \* \* \* \* \* \* \* \* \* \* \* \*



|                |                                                                 |      |
|----------------|-----------------------------------------------------------------|------|
| Nbv3K585703505 | AGGTGAGGATTTTGATAATAGAATGGTGAACCATTTTGTTCAGGAGTTCAAGAGGAAGCA    | 768  |
| Nbv3K765636570 | AGGTGAGGACTTCGACAATAGGTTGGTTAACCACTTCGTTTCAGGAATTCAGAGGAAGAG    | 890  |
| Nbv3K645786225 | AGGTGAGGACTTTGATCAGAGGATTATGGAATACTTTATCAAATTGATTAAGAAGAAGCA    | 967  |
| Nbv3K645789686 | AGGTGAGGACTTTGATCAGAGGATTATGGAATACTTTATCAAATTGATTAAGAAGAAGCA    | 698  |
| Nbv3K685813373 | AGGAGAGGATTTTGACCAGAGGATTATGGAGTACTTCATTAATTTGATAAAGAAGAAGCA    | 1006 |
| CaBLP5         | AGGAGAGGATTTTGACCAGAGGTTATGGAGTATTTTCATTAATTTGATCAAGAAGAAGCA    | 891  |
| Nbv3K585690033 | AGGAGAGGATTTTGATCACAGACTAATGGATTATTTTCATCAAGTTGATTAAGAAGAAATA   | 862  |
|                | *** ***** ** ** * ** * * * * ** * * * * * **                    |      |
| Nbv3K585703505 | TAAGAAGGATATTAGTGGAAACCCGAGAGCGTTGAGGAGGTTAAGGACAGCATGCGGAGAG   | 828  |
| Nbv3K765636570 | CAAAAAGGATATCACTGGTAATCCTAGGGCACTCAGAAGGTTGAGAACTGCATGTGAGAG    | 950  |
| Nbv3K645786225 | TGGAAAGGACATCAGCAAAGACAACAGAGCTCTGGTAAGCTAAGGAGAGAAGCTGAGCG     | 1027 |
| Nbv3K645789686 | TGGAAAGGACATCAGCAAAGACAACAGAGCTCTGGTAAGCTAAGGAGAGAAGCTGAGCG     | 758  |
| Nbv3K685813373 | TGGAAAGGACATCAGCAAGGATAACAGGGCTTTGGGAAAGCTCAGGAGAGAAGCTGAGCG    | 1066 |
| CaBLP5         | CGGAAAGGACATTAGCAAGGATAACAAGGCTTTGGGAAAGCTCAGGAGAGAAGCCGAGCG    | 951  |
| Nbv3K585690033 | TAGCAAGGATATTAGTAATGACAAGAAAGCTCTAGGAAAAGCTTAGAAAGGAATGTGAGAG   | 922  |
|                | ***** ** * * * * ** * * * * ** * * * * **                       |      |
| Nbv3K585703505 | GGCAAAGCGGACGCTGT-CATCGACTGCACAGACTACGATTGAAATTGATTCTTTGTATG    | 887  |
| Nbv3K765636570 | GGCAAAGAGGACTCTTT-CTTCCACTGCTCAGACCACCATTGAAATTGA-----          | 998  |
| Nbv3K645786225 | TGCCAAGAGGGCACTGAGTAGCCAGCAC-CAGGTCCGAGTTGAGATTGAATCTCTTTTTG    | 1086 |
| Nbv3K645789686 | TGCCAAGAGGGCACTGAGTAGCCAGCAC-CAGGTCCGAGTTGAGATTGAATCTCTTTTTG    | 817  |
| Nbv3K685813373 | TGCCAAGCGAGCACTGAGCAGTCAGCAT-CAAGTCAGGGTTGAGATTGAATCTCTCTTCG    | 1125 |
| CaBLP5         | AGCCAAGAGAGCCCTGAGCAGTCAGCAT-CAAGTCAGGGTTGAGATTGAGTCTCTCTTCG    | 1010 |
| Nbv3K585690033 | AGCCAAGAGAGCCTTAAGTAACCAGCAC-CAAGTACGCGTTGAAATCGAGTCTCTTTTCG    | 981  |
|                | ** ** * * * * * * ** * ** ** **                                 |      |
| Nbv3K585703505 | AAGGCATTGATTTTACTCGACTATTACTAGGGCGAGATTCGAGGAGCTGAACATGGATT     | 947  |
| Nbv3K765636570 | -----                                                           |      |
| Nbv3K645786225 | ATGGTACTGACTTCTCTGAACCATTAACCCGTGCTCGCTTTGAGGAGTTGAACAATGATC    | 1146 |
| Nbv3K645789686 | ATGGTACTGACTTCTCTGAACCATTAACCCGTGCTCGCTTTGAGGAGTTGAACAATGATC    | 877  |
| Nbv3K685813373 | ACGGTGTAGATTCTCTGAACCCTTACTCGGGCTCGTTTTGAGGAGCTGAACAACGATT      | 1185 |
| CaBLP5         | ATGGTGTGGATTCTCTGAACCCTTACTCGGGCTCGTTTTGAGGAGCTGAATAATGATT      | 1070 |
| Nbv3K585690033 | ATGGTATTGACTTCTCTGAGCCGTTAACAAGGGCAAGATTCGAGGAA-----            | 1028 |
| Nbv3K585703505 | TGTTTCAGGAAGTGTATGGAGCCAGTGGAAGAAGTGTGTTGAGAGATGCCAAGATGGATAAAA | 1007 |
| Nbv3K765636570 | -----                                                           |      |
| Nbv3K645786225 | TCTTCAAAAAGACAATGGGACCTGTGAAGAAGGCAATGGAAGATGCTGGGCTGGAGAAGA    | 1206 |
| Nbv3K645789686 | TCTTCAAAAAGACAATGGGACCTGTGAAGAAGGCAATGGAAGATGCTGGGCTGGAGAAGA    | 937  |
| Nbv3K685813373 | TGTTTCAGGAAGACAATGGGTCCTGTTAAGAAGGCTATGGAGGATGCTGGGCTACAAAAGA   | 1245 |
| CaBLP5         | TGTTCCGCAAGACAATGACTCCTGTTAAGAAGGCTATGGATGATGCTGGTGTATCAAAGA    | 1130 |
| Nbv3K585690033 | -----                                                           |      |
| Nbv3K585703505 | CCAGTGTCCATGATGTGGTTCTCGTCGGTGGATCAACTAGGATCCCCAAAGTTTCAGCAAT   | 1067 |
| Nbv3K765636570 | -----                                                           |      |
| Nbv3K645786225 | ACCAAATTGATGAGATAGTTCTTGTGGTGGAAAGCACTAGAAATTCAAAAAGTGAACAAC    | 1266 |
| Nbv3K645789686 | ACCAAATTGATGAGATAGTTCTTGTGGTGGAAAGCACTAGAAATTCAAAAAGTGAACAAC    | 997  |
| Nbv3K685813373 | ACCAGATTGACGAAATTGTATTGGTTGGGGAAGTACCAGGATTCCAAAAAGTTCAACAGC    | 1305 |
| CaBLP5         | ACCAGATCGACGAGATTGTCTTGGTTGGTGGAAAGTACCAGGATTCCAAAAAGTTCAACAGC  | 1190 |
| Nbv3K585690033 | -----                                                           |      |

Nbv3K585703505 TACTTCAAGATTTCTTCAATGGAAAGGAGCTTTGTAAAAGCATCAACCCGGACGAAGCAG 1127  
Nbv3K765636570 -----  
Nbv3K645786225 TCCTGAAGGACTATTTTGAAGGGAAGGAGCCTAACAAGGGTGTGAATCCTGACGAGGCAG 1326  
Nbv3K645789686 TCCTGAAGGACTATTTTGAAGGGAAGGAGCCTAACAAGGGTGTGAATCCTGACGAGGCAG 1057  
Nbv3K685813373 TTTTGAAAGATTATTTTCGATGGCAAGGAGCCCAACAAGGGTGTCAACCCGTGACGAAGCAG 1365  
CaBLP5 TTTTGAAAGATTATTTTGTATGGCAAGGAGCCAGCAAGGGTGTCAACCCGTGATGAAGCAG 1250  
Nbv3K585690033 -----

Nbv3K585703505 TCGCCTATGGTGCAGCTGTCCAAGCTGCAATTTTGAGCGGTGTAGGTAATGAAAAAGTTC 1187  
Nbv3K765636570 -----  
Nbv3K645786225 TTGCTTATGGTGCCTGTGTCCAAGTGGTATCTTAAGTGGAGAGGGTGGTGACGAAAATA 1386  
Nbv3K645789686 TTGCTTATGGTGCCTGTGTCCAAGTGGTATCTTAAGTGGAGAGGGTGGTGACGAAAATA 1117  
Nbv3K685813373 TTGCTTATGGTGCAGCTGTACAAGGAGGAATCTTGAGTGGAGA GGGAGGTGATGAAACCA 1425  
CaBLP5 TTGCTTATGGTGCAGCTGTACAAGGAGGAATCTTGAGTGGAGAAGGAGGTGATGAAACCA 1310  
Nbv3K585690033 -----

Nbv3K585703505 AAGACTTGTGCTGTTGGATGTTACTCCTCTGTCTCTGGTTTAGAAACTGCTGGAGGTG 1247  
Nbv3K765636570 -----  
Nbv3K645786225 AAGATATCCTTCTCCTGGATGTTGCTCCTCTCACCTTGGTATTGAAACTGTTGGTGGCG 1446  
Nbv3K645789686 AAGATATCCTTCTCCTGGATGTTGCTCCTCTCACCTTGGTATTGAAACTGTTGGTGGCG 1177  
Nbv3K685813373 AAGATATCTTCTCCTGGATGTTGCTCCATTGACTCTTGGTATTGAAACGGTTGGA GAG 1485  
CaBLP5 AAGATATCTTCTCCTGGATGTTGCTCCACTGACTCTTGGTATTGAAACTGTTGGAGGAG 1370  
Nbv3K585690033 -----

Nbv3K585703505 TAATGACTGTGTTGATACCAAGGAACACAACCTATTTCCACCAAGAAAGAGCAAGTGTCT 1307  
Nbv3K765636570 -----  
Nbv3K645786225 TGATGACCAAATTGATTTCCTAGGAACACTGTCATCCCA ACCAAGAAGTCTCAAGTCTTCA 1506  
Nbv3K645789686 TGATGACCAAATTGATTTCCTAGGAACACTGTCATCCCA ACCAAGAAGTCTCAAGTCTTCA 1237  
Nbv3K685813373 TGATGACAAAAGTTGATCCCAAGGAACACTGTTATTCCTACTAAGAAA TCTCAAGTTTTCA 1545  
CaBLP5 TGATGACAAAAGTTGATCCCAAGAAACACCGTCATTCTACCAAGAAGTCTCAAGTCTTCA 1430  
Nbv3K585690033 -----

Nbv3K585703505 CTACGTA CTGGACAACCAACCTGGTGTGCTGATCCAGGTGTACGAGGGAGAACGAGCCA 1367  
Nbv3K765636570 -----  
Nbv3K645786225 CTACATACCAAGACCAGCAGACCCTGTCCACATTTTCGGTTTATGAAGGAGAAAAGGAGTC 1566  
Nbv3K645789686 CTACATACCAAGACCAGCAGACCCTGTCCACATTTTCGGTTTATGAAGGAGAAAAGGAGTC 1297  
Nbv3K685813373 CCACTTACCAGGATCAGCAGACAACAGTAACAATTTTCGGTCTTTGAAGGTGAACGCAGTC 1605  
CaBLP5 CCACTTACCAGGACCAGCAGACAACAGTCACAATTTTCGGTCTTCGAAGGTGAACGAAGTA 1490  
Nbv3K585690033 -----

Nbv3K585703505 GGACCAAGGACAACAACCTGTTAGGCAAATTTGAACTCTCTGGTATCCCCCTGCTCCAA 1427  
Nbv3K765636570 -----  
Nbv3K645786225 TTACTAAGGACTGCAGGCTCCTTGGAAAATTTGATCTGACCGGAATTCCTCCAGTCCAA 1626  
Nbv3K645789686 TTACTAAGGACTGCAGGCTCCTTGGAAAATTTGATCTGACCGGAATTCCTCCAGTCCAA 1357  
Nbv3K685813373 TCACCAAGGACTGCAGGCTACTTGGGAAAATTTGACTTAACTGGAATAGCTCCAGTCCAA 1665  
CaBLP5 TGGTAAAGGACTGTAGACTGCTCGGTAAATTCGACTTAAACAGGAATACCTCCAGTCCAA 1550  
Nbv3K585690033 -----

Nbv3K585703505 GGGGTGTTCTCAAATCAATGTCTGCTTTGACATTGATGCCAATGGCATTCTCAATGTTT 1487  
Nbv3K765636570 -----  
Nbv3K645786225 GGGGAACACCTCAAATTGAGGTTACCTTTGAAGTTGATGCAAACGGTATTTTGAATGTCA 1686  
Nbv3K645789686 GGGGAACACCTCAAATTGAGGTTACCTTTGAAGTTGATGCAAACGGTATTTTGAATGTCA 1417  
Nbv3K685813373 GAGGAACCTCTCAAATTGAAGTTACGTTTGAAGTTGATGCCAACGGTATCCTGAATGTGA 1725  
CaBLP5 **GAGGAACACCTCAAATTGAAGTTACTTTTGAAGTTCGATGCCAACGGTATCTTGAACGTGA** 1610  
Nbv3K585690033 -----

Nbv3K585703505 CTGCCGAGGACAAACTACTGGTCAGAAGAACAAGATAACGATCACCAACGACAAAGGCC 1547  
Nbv3K765636570 -----  
Nbv3K645786225 AAGCAGAAGATAAGGGCACTGGTAAATCAGAGAAGATTACCATTACAAATGACAAGGGCC 1746  
Nbv3K645789686 AAGCAGAAGATAAGGGCACTGGTAAATCAGAGAAGATTACCATTACAAATGACAAGGGCC 1477  
Nbv3K685813373 AAGCGGAAGATAAAGCCTCTGGAAGTCAGAGAAGATCACCATTACCAATGATAAG**GGTC** 1785  
CaBLP5 **AAGCTGAGGACAAAGCCTCTGGAAGTCGGAAGATTACAATCACTAATGACAAGGGTC** 1670  
Nbv3K585690033 -----

Nbv3K585703505 GGCTCTCCAAGGAAGAGATTGAGAGAATGGTGCAAGAAGCTGAGAAGTACAAGTCTGAAG 1607  
Nbv3K765636570 -----  
Nbv3K645786225 GCTTAAGCCAAGAAGAGATTGAACGAATGGTTCGTGAAGCAGAAGAGTTTCCGAGGAAG 1806  
Nbv3K645789686 GCTTAAGCCAAGAAGAGATTGAACGAATGGTTCGTGAAGCAGAAGAGTTTCCGAGGAAG 1537  
Nbv3K685813373 **GCTTGAGTCAAGAAGAAATTTGAACGTATGGTCAAGGAGGCTGAGGAGTTTCTGAGGAGG** 1845  
CaBLP5 **GCTTGAGTCAAGAAGAAATTTGAACGTATGGTGAAGGAGGCTGAGGAGTTTCTGAGGAGG** 1730  
Nbv3K585690033 -----

Nbv3K585703505 ATGAAGAGCTTAAGAAAAAAGTGAAGCTAAGAATGCCTTGGAGAATTACGCTTACAACA 1667  
Nbv3K765636570 -----  
Nbv3K645786225 ACAAGAAGGTGAAGGAGAGGATTGACGCCCGTAATGGTCTTGAAACCTATGTGTACAACA 1866  
Nbv3K645789686 ACAAGAAGGTGAAGGAGAGGATTGACGCCCGTAATGGTCTTGAAACCTATGTGTACAACA 1597  
Nbv3K685813373 ACAAGAAGGTGAAAGAACGAATTGACGCGGAAACAGCCTGGAGACTTACGTGTACAACA 1905  
CaBLP5 **ACAAGAAGGTGAAAGAAGAGTTGACGCCCGAAACAGCCTGGAGACATACGTATACAACA** 1790  
Nbv3K585690033 -----

Nbv3K585703505 TGAGGAATACAATCAAAGAT---GACAAGATTAGCTCCCAACTACCGGCTGCTGATAGGA 1724  
Nbv3K765636570 -----  
Nbv3K645786225 TGAAAAACCAGATTAACGACAAGGACAAGCTTGCTGACAAGCTCGAGGTCGATGAGAAGG 1926  
Nbv3K645789686 TGAAAAACCAGATTAACGACAAGGACAAGCTTGCTGACAAGCTCGAGGTCGATGAGAAGG 1657  
Nbv3K685813373 **TGAGGAACCAAATCAATGACAAGGATAAACTTGACAGACAAGTTAGAGTCTGATGAGAAA** 1965  
CaBLP5 **TGAGGAACCAAATCAATGACAAGGACAAACTTGACAGACAAGTTAGAGTCTGACGAGAAG** 1850  
Nbv3K585690033 -----

Nbv3K585703505 AGAAGATTGAGGACGCAATTGATGAAGCTATCAAGTGGCTGGACAGCAACCAACTTGACG 1784  
Nbv3K765636570 -----  
Nbv3K645786225 AGAAGATTGAGACTGCCGTAAGGAAGCCCTCGAGTGGCTGGATGACAACCAAAGTGCTG 1986  
Nbv3K645789686 AGAAGATTGAGACTGCCGTAAGGAAGCCCTCGAGTGGCTGGATGACAACCAAAGTGCTG 1717  
Nbv3K685813373 **AGAAGATTGAAACAGCCACAAAAGAAGCACTTG**AATGGTTGGACGACAACCAGAGCGCTG 2025  
CaBLP5 **AGAAGATTGAAACAGCCACAAAAGAAGCACTTGACTGGTTGGACGACAACCAGAGTGCTG** 1910  
Nbv3K585690033 -----

Nbv3K585703505 AGGTGGATGAATTTGAAGACAAGATGAAGGAGCTGGAAGGTATCTGCAATCCAATCATTG 1844  
Nbv3K765636570 -----  
Nbv3K645786225 AGAAAGAGGACTACGAGGAGAAGCTGAAAGAGGTCGAGGCAGTATGCAACCCAATCATCA 2046  
Nbv3K645789686 AGAAAGAGGACTACGAGGAGAAGCTGAAAGAGGTCGAGGCAGTATGCAACCCAATCATCA 1777  
Nbv3K685813373 AGAAGGAGGATTATGATGAAAACTGAAAGAAGTGGAGGCTGTGTGCAACCCAATTATCA 2085  
CaBLP5 AGAAGGAGGATTACGACGAGAAGCTGAAAGAAGTTGAGGCAGTGTGCAACCCAATTATCA 1970  
Nbv3K585690033 -----

Nbv3K585703505 CTAAGATGTATCAAGGTGGTCTGGTGGAGCTACTATGGATGAAGATGGTCCTTCTGTGG 1904  
Nbv3K765636570 -----  
Nbv3K645786225 CAGCTGTTTATCAACGAT---CAGGTGGAGCCCAAGTGTT-----CA 2087  
Nbv3K645789686 CAGCTGTTTATCAACGAT---CAGGTGGAGCCCAAGTGTT-----CA 1818  
Nbv3K685813373 CCGCTGTGTATCAGAGAT---CTGGTGGAGCCCCAGGAGG-----TG 2124  
CaBLP5 CCGCTGTGTATCAGAGGT---CTGGTGGAGCCCCAGGAGGTGCCA-----GTGAGGATT 2021  
Nbv3K585690033 -----

Nbv3K585703505 CTGGCGGAGCTGGAAAACGGAAGTGGTCTGGACCGAAGATT----- 1945  
Nbv3K765636570 -----  
Nbv3K645786225 TCAGCAGAA--GAAGAAGATGGACATGATGAACTGTAGGTT----- 2126  
Nbv3K645789686 TCAGCAGAA--GAAGAAGATGGACATGATGAACTGTAGGTTAAACTTAACTTCCATTG 1876  
Nbv3K685813373 CCAG----- 2128  
CaBLP5 CCAAC-GAT--GATGACGATTCACACGACGAGCTGTGATGGAATTTCTAGGTTTTGTTAG 2078  
Nbv3K585690033 -----

Nbv3K585703505 -----  
Nbv3K765636570 -----  
Nbv3K645786225 -----  
Nbv3K645789686 ACGCTGCTGAAAAGAGGCAAAAACAAGAGGATACAGGTAGACCAAGGCGAGTTTAGTGTA 1936  
Nbv3K685813373 -----  
CaBLP5 TTTTCTCTTCCAAATAGAAGATAAGAATACACTTCTG-----CTGTTATGA 2125  
Nbv3K585690033 -----

Nbv3K585703505 -----  
Nbv3K765636570 -----  
Nbv3K645786225 -----  
Nbv3K645789686 GTTGTAAGTTTTGTCATTGTTAAGTACGAGGGAAGAGGTATCCCTTCGCTTGGTCTTTT 1996  
Nbv3K685813373 -----  
CaBLP5 TTTCTAAAATGTAATATCACC--GTATGAAGGGTGAACGTAGAACAACTTGGAAGAAA 2182  
Nbv3K585690033 -----

Nbv3K585703505 -----  
Nbv3K765636570 -----  
Nbv3K645786225 -----  
Nbv3K645789686 GAGGTGAAGATACTTTTGAAGGACGTTTTCTCGTTTTAACTTGATTCTGCTTCGATCT 2056  
Nbv3K685813373 -----  
CaBLP5 CCGTGAGGGAGGGATGTGTAATGTCGCTCTGGTCT-----CTTTCCGCT 2226  
Nbv3K585690033 -----

```

Nbv3K585703505 -----
Nbv3K765636570 -----
Nbv3K645786225 -----
Nbv3K645789686 GTTTTAGAACTTCTGAGATTAGTTGAATCTAACGGAATCAAATTCAGAATGAAGTTTAAAC 2116
Nbv3K685813373 -----
CaBLP5 GTTTCATTTTTTCCCGTACACCTGTATAGGCGACATTTAATTCAGAGTTCAAATTTCTT 2286
Nbv3K585690033 -----

Nbv3K585703505 -----
Nbv3K765636570 -----
Nbv3K645786225 -----
Nbv3K645789686 ATGCCAAGTTTCCATTTTGCATCAGTTGTAATGTCCTTTTTCCATCAGTTGTTTTTATA 2176
Nbv3K685813373 -----
CaBLP5 GTATTCATTTGTCTGTGGGTGTTTTATCTTTTAAGGCTTGTCGCCAAGCAAAGAGTAAG 2346
Nbv3K585690033 -----

Nbv3K585703505 -----
Nbv3K765636570 -----
Nbv3K645786225 -----
Nbv3K645789686 ATAACAACCTTTATCAGCATCAAGCTC 2203
Nbv3K685813373 -----
CaBLP5 GCTATAAGTCAAAAAAAAAAGCGGCCGC 2373
Nbv3K585690033 -----

```

**Fig. S3 Multiple sequence alignment of the CaBLP5 and six *N. benthamiana* BiP genes with Clustal 2.1.** The asterisks at the bottom line of the alignment indicate identical residues in a given sequence position. Within the aligned sequences, the dashes indicate the gaps that were inserted in order to optimize the alignment. The CaBLP5 nucleotide sequences in red color used for *Tobacco rattle virus* (TRV)2-*CaBLP5* construct. Residues underlined red represent gene-specific primer sequences used for detecting each gene expression in *GFP*- or *CaBLP5*-silenced plants. Residues in turquoise indicate stretches of more than 21 nucleotides (Liu *et al.*, 2002) that is identical between TRV2-*CaBLP5* and the corresponding *NbBiP* homologs. Note that TRV2-*CaBLP5* contains a stretch of 21 nucleotides of 100% identity with *Nbv3K645786225* and *Nbv3K645789686* and multiple 21-nucleotide stretches of 100% identity with *Nbv3K685813373*, while no stretches of 21 nucleotides with perfect matches to other *BiP* homologs.

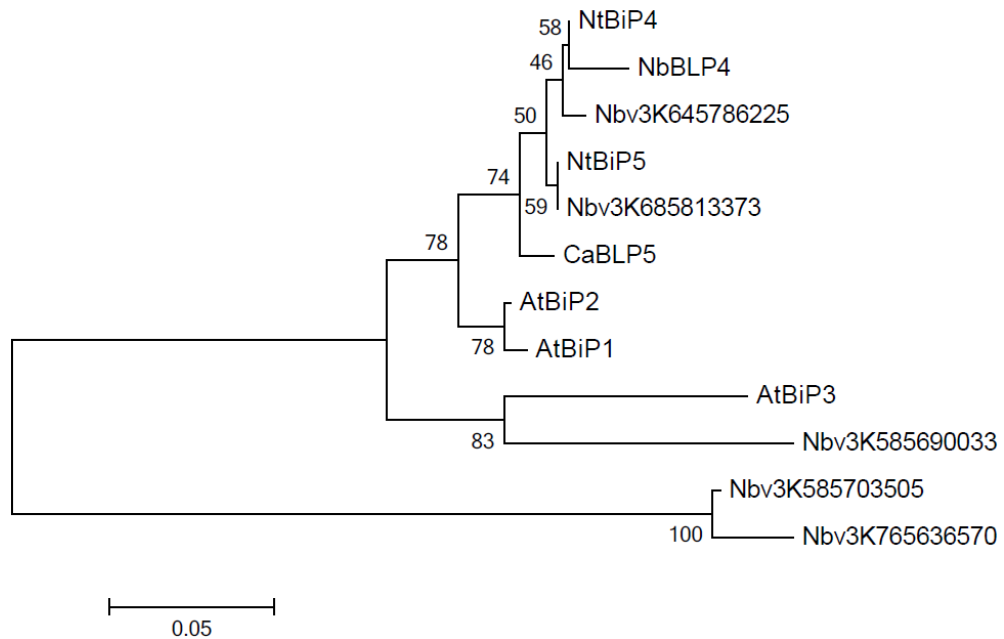

**Fig. S4 Phylogenetic analysis of CaBLP5 and its tobacco, and *Arabidopsis* homologs.** The amino acid sequences of 11 CaBLP5 homologs were imported into MEGA 6 for multiple sequence alignment with ClustalW. Phylogenetic analysis was performed using the neighbor-joining and bootstrap methods. The bootstrap consensus tree was inferred from 500 replicates. The scale bar indicates the lengths of the branches (relative evolutionary distance). GenBank accession numbers for the homolog protein are mentioned in legend of Fig. S2.

Nbv3K685813373 MAG-AWKRRASLVVFAIVLFGSLFAFSIAKEEATKLGTVIGIDLGGTYSVGVYKNGHVE 59  
 CaBLP5 MAA-AWKTRASLVVFAIVLFGSLFAFSIAKEEATKLGTVIGIDLGGTYSVGVYKNGHVE 59  
 NbBLP4 MAGGAWNRRASLIVFGIVLFGCLFAFSIATEEATKLGTVIGIDLGGTYSVGVYKNGHVE 60  
 Nbv3K645786225 MGGGYWRRSSSLVLAIVLFGCLSALSIAATEANKLGTVIGIDLGGTYSVGVYKNGHVE 60

Nbv3K685813373 I IANDQGNRI TPSWVAFTDGERLIGEAANKQA AVNPRTIFDVKRLIGRKFDDKEVQRDK 119  
 CaBLP5 I IANDQGNRI TPSWVAFTDGERLIGEAANKQA AVNPRTIFDVKRLIGRKFDDKEVQRDM 119  
 NbBLP4 I IANDQGNRI TPSWVAFTDGERLIGEAANKQA AVNPRTIFDVKRLIGRKFDDKEVQRDM 120  
 Nbv3K645786225 I IANDQGNRI TPSWVGFDTGERLIGEAANKQA AVNPRTIFDVKRLIGRKFDDKEVQRDM 120

Nbv3K685813373 KLVPEYIVNKDGPYIQVKIKDGETKVFSP EESAMILTKMKETA EAYLGKIKDAVTV 179  
 CaBLP5 KLVPEYIVNKDGPYIQVKIKDGETKVFSP EESAMILTKMKETA EAYLGKIKDAVTV 179  
 NbBLP4 KLVPEYIVNKDGPYIQVKIKDGETKVFSP EESAMILTKMKETA EAYLGKIKDAVTV 180  
 Nbv3K645786225 KLVPEYIVNKDGPYIQVKIKDGEV KVFSP EESAMILTKMKETA EAYLGKIKDAVTV 180  
 \*\*\*\*\*: \*\*\*\*\*: \*\*\*\*. \*\*\*\*\*: \*\*\*\*\*: \*\*\*\*. \*\*\*\*\*

Nbv3K685813373 PAYFNDAQRQATKDAGVIAGLNVARI INEPTAAA IAYGLDKKGGEKNILVFDLGGGTFDV 239  
 CaBLP5 PAYFNDAQRQATKDAGVIAGLNVARI INEPTAAA IAYGLDKKGGEKNILVFDLGGGTFDV 239  
 NbBLP4 PAYFNDAQRQATKDAGVIAGLNVARI INEPTAAA IAYGLDKKGGEK SILVFDLGGGTFDV 240  
 Nbv3K645786225 PAYFNDAQRQATKDAGVIAGLNVARI INEPTAAA IAYGLDKKGGEKNILVFDLGGGTFDV 240  
 \*\*\*\*\*: \*\*\*\*\*: \*\*\*\*\*: \*\*\*\*\*: \*\*\*\*\*: \*\*\*\*\*

Nbv3K685813373 SILTIDNGVFEVLATNGDTHLGGEDFDQRIMEYFIKLIK KKHGKDISKDNRALGKLRREA 299  
 CaBLP5 SILTIDNGVFEVLATNGDTHLGGEDFDQRIMEYFIKLIK KKHGKDISKDNKALGKLRREA 299  
 NbBLP4 SILTIDNGVFEVLSTNGDTHLGGEDFDQRIMEYFIKLIK KKHGKDISKDNRALGKLRREA 300  
 Nbv3K645786225 SVLTIDNGVFEVLSTNGDTHLGGEDFDQRIMEYFIKLIK KKHGKDISKDNRALGKLRREA 300  
 \*. \*\*\*\*\*: \*\*\*\*\*: \*\*\*\*\*: \*\*\*\*\*: \*\*\*\*\*: \*\*\*\*\*

Nbv3K685813373 ERAKRALSSQHQRVVEIESLFDGVDFSEPLTRARFEELNNDLFRKTMGPVKKAMEDAGLQ 359  
 CaBLP5 ERAKRALSSQHQRVVEIESLFDGVDFSEPLTRARFEELNNDLFRKTMTPVKKAMDDAGVS 359  
 NbBLP4 ERAKRALSSQHQRVVEIESLFDGVDFSEPLTRARFEELNNDLFRKTMGPVKKAMDDAGLE 360  
 Nbv3K645786225 ERAKRALSSQHQRVVEIESLFDGVDFSEPLTRARFEELNNDLFRKTMGPVKKAMDDAGLE 360  
 \*\*\*\*\*: \*\*\*\*. \*\*\*\*\*: \*\*\*\*\*: \*\*\*\*. \*\*\*\*\*: \*\*\*\*.

Nbv3K685813373 KNQIDEIVLVGGSTRIPKVQQLLKDYFDGKEPNKGVNPDEAVAYGA AVQGGILSGEGGDE 419  
 CaBLP5 KNQIDEIVLVGGSTRIPKVQQLLKDYFDGKEPSKGVNPDEAVAYGA AVQGGILSGEGGDE 419  
 NbBLP4 KTQIDEIVLVGGSTRIPKVQQLLKDYFDGKEPNKGVNPDEAVAYGA AVQGGILSGEGGDE 420  
 Nbv3K645786225 KNQIDEIVLVGGSTRIPKVQQLLKDYFDGKEPNKGVNPDEAVAYGA AVQGGILSGEGGDE 420  
 \*. \*\*\*\*\*: \*\*\*\*\*: \*\*\*\*\*: \*\*\*\*\*: \*\*\*\*\*: \*\*\*\*\*

Nbv3K685813373 TKDILLLDVAPLTLGIETVGGVMTKLIPRNTVIP TKKSQVFTTYDQQT TVTISVFEGE 479  
 CaBLP5 TKDILLLDVAPLTLGIETVGGVMTKLIPRNTVIP TKKSQVFTTYDQQT TVTISVFEGE 479  
 NbBLP4 TKDILLLDVAPLTLGIETVGGVMTKLIPRNTVIPS KKSQVFTTYDQQT TVTIQVFEGE 480  
 Nbv3K645786225 TKDILLLDVAPLTLGIETVGGVMTKLIPRNTVIP TKKSQVFTTYDQQT TVTISVYEGE 480  
 \*\*\*\*\*: \*\*\*\*\*: \*\*\*\*\*: \*\*\*\*\*: \*\*\*\*\*: \*\*\*\*\*

Nbv3K685813373 SLTKDCRLLGKFDLTGIAPAPRGTQIEVTFEVDANGILNVAEDKASGKSEKITITNDK 539  
 CaBLP5 SMVKDCRLLGKFDLTGIAPAPRGTQIEVTFEVDANGILNVAEDKASGKSEKITITNDK 539  
 NbBLP4 SLTKDCRLLGKFDLTGIAPAPRGTQIEVTFEVDANGILNVAEDKASGKSEKITITNDK 540  
 Nbv3K645786225 SLTKDCRLLGNFDLTGIAPAPRGTQIEVTFEVDANGILNVAEDKGTGKSEKITITNDK 540  
 \*. \*\*\*\*\*: \*\*\*\*\*: \*\*\*\*\*: \*\*\*\*\*: \*\*\*\*\*: \*\*\*\*\*

Nbv3K685813373 GRLSQEEIERMVKEAEFEAEEDKVKKERIDARNSLETYYNMRNQINDKDKLADKLESE 599  
 CaBLP5 GRLSQEEIERMVKEAEFEAEEDKVKKERV DARNSLETYYNMRNQINDKDKLADKLESE 599  
 NbBLP4 GRLSQEEIERMVKEAEFEAEEDKVKKERIDARNSLETYYNMRNQINDKDKLADKLESE 600  
 Nbv3K645786225 GRLSQEEIERMVEAEFEAEEDKVKKERIDARNGLETYYNMRNQINDKDKLADKLEVE 600  
 \*\*\*\*\*: \*\*\*\*\*: \*\*\*\*\*: \*\*\*\*\*: \*\*\*\*\*: \*\*\*\*\*

Nbv3K685813373 SLTKDCRLLGKFDLTGIAPAPRGTQIEVTFEVDANGILNVAEDKASGKSEKITITNDK 539  
 CaBLP5 SMVKDCRLLGKFDLTGIAPAPRGTQIEVTFEVDANGILNVAEDKASGKSEKITITNDK 539  
 NbBLP4 SLTKDCRLLGKFDLTGIAPAPRGTQIEVTFEVDANGILNVAEDKASGKSEKITITNDK 540  
 Nbv3K645786225 SLTKDCRLLGNFDLTGIAPAPRGTQIEVTFEVDANGILNVAEDKGTGKSEKITITNDK 540  
 \*. \*\*\*\*\*: \*\*\*\*\*: \*\*\*\*\*: \*\*\*\*\*: \*\*\*\*\*: \*\*\*\*\*

|                |                                                               |     |
|----------------|---------------------------------------------------------------|-----|
| Nbv3K685813373 | GRLSQEEIERMVKEAEFFAEEDKKVKERIDARNSLETYYVYNMRNQINDKDKLADKLESDE | 599 |
| CaBLP5         | GRLSQEEIERMVKEAEFFAEEDKKVKERVDARNSLETYYVYNMRNQINDKDKLADKLESDE | 599 |
| NbBLP4         | GRLSQEEIERMVKEAEFFAEEDKKVKERIDARNSLETYYVYNMRNQINDKDKLADKLESDE | 600 |
| Nbv3K645786225 | GRLSQEEIERMVREAEFFAEEDKKVKERIDARNGLETYYVYNMKNQINDKDKLADKLEVDE | 600 |
|                | *****:*****:***.*****:***** **                                |     |
|                |                                                               |     |
| Nbv3K685813373 | KEKIETATKEALEWLDDNQSAEKEDYDEKLKEVEAVCNPIITAVYQRSGGAPGGA-----  | 654 |
| CaBLP5         | KEKIETATKEALDWLDDNQSAEKEDYDEKLKEVEAVCNPIITAVYQRSGGAPGGASEDSN  | 659 |
| NbBLP4         | KEKIETATKEALEWLDDNQSAEKEDYEEKLKEVEAVCNPIITAVYQKSGGAPGGESGASE  | 660 |
| Nbv3K645786225 | KEKIETAVKEALEWLDDNQSAEKEDYEEKLKEVEAVCNPIITAVYQRSGGAPSGS---SA  | 657 |
|                | *****.***:*****:*****:*****.*                                 |     |
|                |                                                               |     |
| Nbv3K685813373 | -----                                                         |     |
| CaBLP5         | DDDDSHDEL                                                     | 668 |
| NbBLP4         | DDD--HDEL                                                     | 667 |
| Nbv3K645786225 | EEEDGHDEL                                                     | 666 |

**Fig. S5 Putative amino acid sequence alignment of the CaBLP5 (AGS42239) and its *N. benthamiana* homologs.** The amino-acid sequences of three CaBLP5 homologs were aligned with ClustalW. The asterisks at the bottom line of the alignment indicate identical residues in a given sequence position, while single and double dots refer to highly and moderately conserved residues, respectively. Within the aligned sequences, the dashes indicate the gaps that were inserted in order to optimize the alignment.



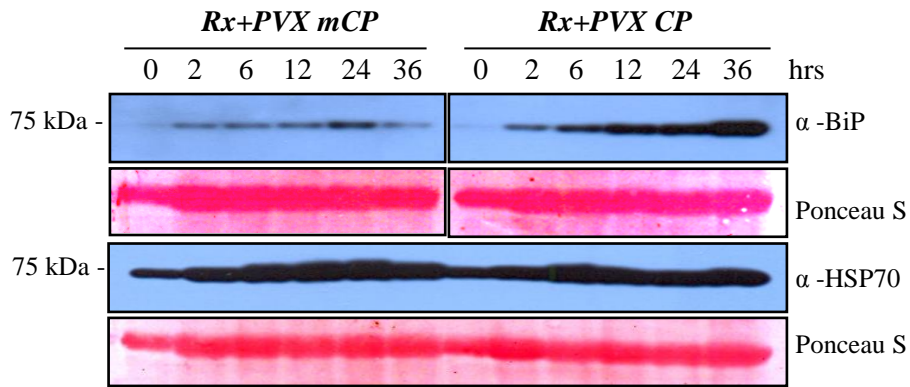

**Fig. S6 BiP was promoted at protein level by induction of the Rx-mediated HR.** *Rx* and mutant *PVX CP* (*PVX mCP*) or wild type of *PVX CP* (*PVX CP*) were co-expressed in leaves of *N. benthamiana*, respectively. Total protein was extracted from *N. benthamiana* leaves expressing the indicated proteins at the designated time points and analyzed by immunoblotting with anti-BiP or -cytosolic heat shock protein (HSP) 70 antibodies. Ponceau S staining of Rubisco was used for loading control.

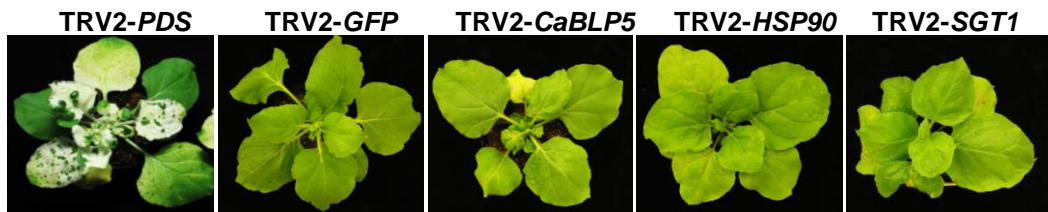

**Fig. S7 Morphological phenotype of the *CaBLP5*-VIGS *N. benthamiana* plant.** *GFP*- and *PDS*- silenced plants were used as negative and positive reference for the VIGS experiment. The silenced plants were photographed at 21 dpi.

**A**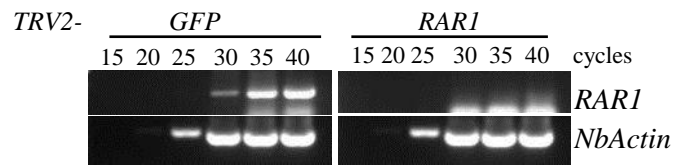**B**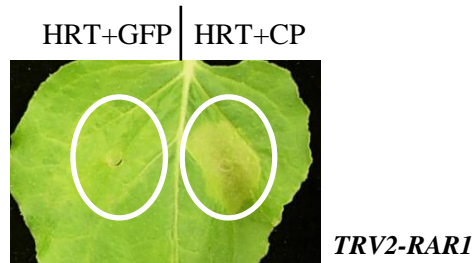**C**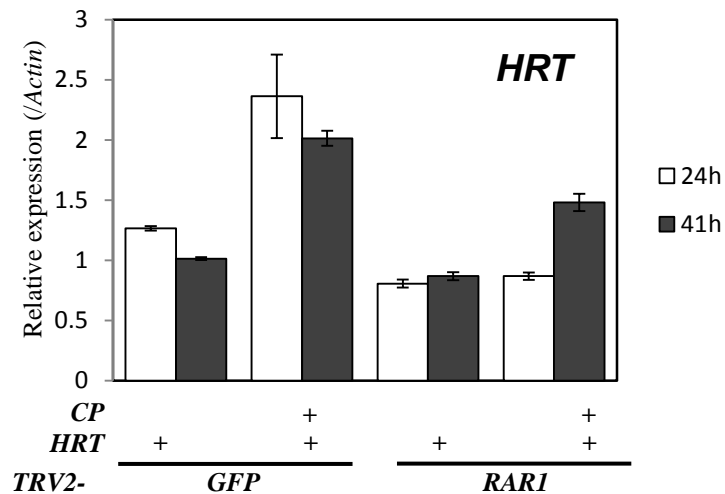

**Fig. S8 Silencing of *RAR1*.** (A) Reverse transcription PCR analysis was performed to assess the efficiency of gene silencing. Primer directed to gene specific, or *NbActin*, with use of equal amount of cDNA from silenced plants. Numbers indicate PCR cycles. (B) HRT/CP-mediated HR induction on the leaves of the *RAR1*-silenced plants. (C) Transcriptional levels of the *HRT* in *GFP*- or *RAR1*-silenced plant. The values were normalized to the expression of *NbActin*. Error bars represent SD ( $n = 3$ ). Means with the same letter are not significantly different ( $t$  test,  $P$  value  $< 0.001$ ).

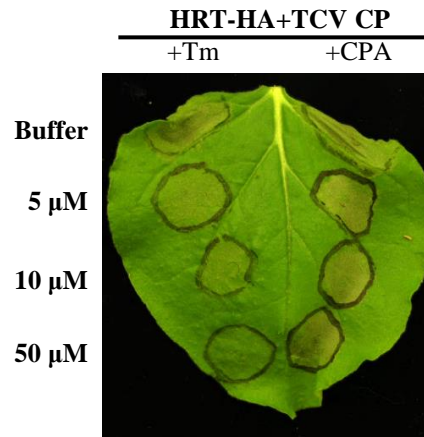

**Fig. S9 Effect of Tunicamycin (Tm) on cell death by co-expression of HRT/TCV CP.** Endoplasmic reticulum (ER) stress-inducing chemical TM was co-infiltrated as indicated concentrations, and infiltration buffer was used as reference. Pictures were taken 3 dpi.

**A**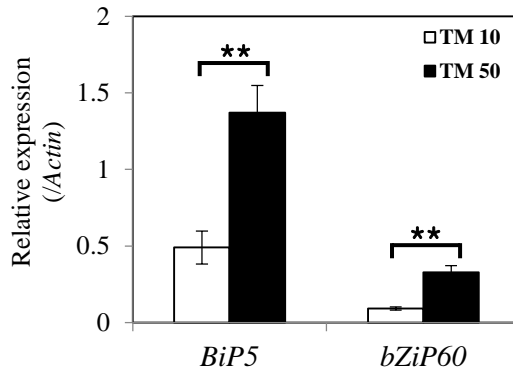**B**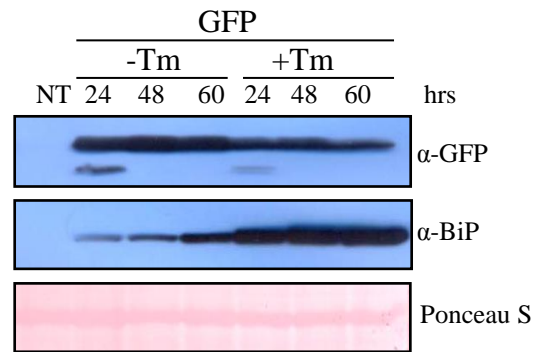

**Fig. S10 Triggering the unfolded protein response (UPR) pathway by Tm treatment.** (A) Expression of *BiP5* and *bZiP60* in TRV2-GFP-infected plants by qRT-PCR. Error bars present standard error of three replicates. Asterisks indicate a significant difference from corresponding control (Student's *t*-test,  $**P < 0.005$ ). Tm 10, 10  $\mu$ M Tm; Tm 50, 50  $\mu$ M Tm. (B) Effects of Tm treatment on levels of BiP proteins. Total protein was prepared at the indicated time points (hrs). BiP and GFP proteins were detected using anti-BiP and anti-GFP antibodies.

## References

Larkin, M.A., Blackshields, G., Brown, N. P., Chenna, R., McGettigan, P. A., McWilliam, H., Valentin, F., Wallace, I. M., Wilm, A., Lopez, R., Thompson, J. D., Gibson, T. J., and Higgins, D. G. (2007) Clustal W and Clustal X version 2.0. *Bioinformatics*, 23, 2947–2948.

Liu, Y., Schiff, M. and Dinesh-Kumar, S. P. (2002) Virus-induced gene silencing in tomato. *Plant J.*, 31, 777-786.

Saitou, N. and Nei, M. (1987) The neighbor-joining method: a new method for reconstructing phylogenetic trees. *Mol. Biol. Evol.* 4, 406–425.

Tamura, K., Stecher, G., Peterson, D., Filipski, A. and Kumar, S. (2013) MEGA6: Molecular Evolutionary Genetics Analysis version 6.0. *Mol. Biol. Evol.*, 30,:2725–2729.
